# Supplementary material
Source: PubMed Central journal article supplement (PMC9892211)

# Supplementary: Outcomes of first-line therapy after CD19-CAR-T failure in large B-cell lymphoma

## Contents

|                                                                                                                                                           |    |
|-----------------------------------------------------------------------------------------------------------------------------------------------------------|----|
| Supplementary Tables.....                                                                                                                                 | 2  |
| Table S1. Definitions .....                                                                                                                               | 2  |
| Table S2. Flow cytometry panels and methodology .....                                                                                                     | 3  |
| Table S3. Grade of CRS and ICANS and responses by CAR-T product.....                                                                                      | 4  |
| Abbreviations: Point-of-Care CD19-CAR-T cell (POC), Cytokine release syndrome (CRS), Immune effector cell-associated neurotoxicity syndrome (ICANS) ..... | 5  |
| Table S4. Comparisons between refractory to CAR-T patients and those who responded to CAR-T and relapsed .....                                            | 6  |
| Table S5. Comparison of features by anti-cancer treatment status after CAR-T therapy .....                                                                | 9  |
| Table S6. Post-CAR-T Treatment strategies.....                                                                                                            | 11 |
| Table S7. Patient characteristics by post-CAR-T treatment groups.....                                                                                     | 12 |
| Table S8. Response rates to first-line treatment post CAR T therapy .....                                                                                 | 16 |
| Table S9. 1-year probability of overall survival by treatment strategies .....                                                                            | 17 |
| Table S10. Multivariable Cox regression model comparing overall survival between the most frequent treatment groups after CAR-T .....                     | 18 |
| Supplementary Figures .....                                                                                                                               | 19 |

## Supplementary Tables

Table S1. Definitions

|                                           |                                                                                                            |
|-------------------------------------------|------------------------------------------------------------------------------------------------------------|
| Best response                             | Best response denotes the best response achieved up to 100 days following CD19-CAR-T cells infusion.       |
| Pre-treatment lactate dehydrogenase (LDH) | Pre-treatment LDH was defined as the highest LDH level in the 15 days preceding first therapy after CAR-T. |
| Cell of origin                            | Defined according to Hans algorithm. (Hans et al, Blood 103:275-282, 2004)                                 |

Table S2. Flow cytometry panels and methodology

|                                   |
|-----------------------------------|
| <b>B cell panel up to 10/2020</b> |
| surface Kappa FITC                |
| surface Lambda PE                 |
| CD10 PC5                          |
| CD20 PC7                          |
| CD38 APC                          |
| CD22 APC-A700                     |
| CD45 APC-H7                       |
| CD19 BV421                        |
| CD5 BV510                         |
| <b>B cell panel after 10/2020</b> |
| surface Kappa FITC                |
| surface Lambda PE                 |
| CD25 PE-Dazzle 594                |
| CD22 PC5.5                        |
| CD19 PC7                          |
| CD10 APC                          |
| CD45 APC-H7                       |
| CD5 BV421                         |
| CD38 BV480                        |
| CD279 (PD1) BV605                 |
| CD20 BV650                        |
| CD3 BUV737                        |
| CD14 BUV805                       |

Reference ranges were established using CD19 intensity on normal samples. The expression was classified as "dim" if the mean fluorescence intensity (MFI) was  $< \frac{1}{2}$  of the mean of the reference range; expression was classified as "negative" if  $< 20\%$  of the cells showed expression above the negative internal reference (T cells)

Table S3. Grade of CRS and ICANS and responses by CAR-T product

| Characteristic                  | Overall,<br>N =<br>305 <sup>1</sup> | Axicabtagene<br>ciloleucel<br>n = 116 <sup>1</sup> | Tisagenlecleucel<br>n = 83 <sup>1</sup> | POC-CAR-T<br>n = 78 <sup>1</sup> | Lisocabtagene<br>maraleucel,<br>n = 28 <sup>1</sup> |
|---------------------------------|-------------------------------------|----------------------------------------------------|-----------------------------------------|----------------------------------|-----------------------------------------------------|
| <b>Maximum CRS grade</b>        |                                     |                                                    |                                         |                                  |                                                     |
| 0                               | 73<br>(24%)                         | 16 (14%)                                           | 28 (34%)                                | 13 (17%)                         | 16 (57%)                                            |
| 1                               | 132<br>(43%)                        | 43 (37%)                                           | 30 (36%)                                | 49 (63%)                         | 10 (36%)                                            |
| 2                               | 69<br>(23%)                         | 42 (36%)                                           | 18 (22%)                                | 8 (10%)                          | 1 (4%)                                              |
| 3                               | 23 (8%)                             | 11 (9%)                                            | 6 (7%)                                  | 6 (8%)                           | 0 (0%)                                              |
| 4                               | 7 (2%)                              | 4 (3%)                                             | 0 (0%)                                  | 2 (3%)                           | 1 (4%)                                              |
| 5                               | 1 (0%)                              | 0 (0%)                                             | 1 (1%)                                  | 0 (0%)                           | 0 (0%)                                              |
| <b>Maximum ICANS grade</b>      |                                     |                                                    |                                         |                                  |                                                     |
| 0                               | 209<br>(69%)                        | 68 (59%)                                           | 67 (81%)                                | 49 (63%)                         | 25 (89%)                                            |
| 1                               | 27 (9%)                             | 10 (9%)                                            | 8 (10%)                                 | 8 (10%)                          | 1 (4%)                                              |
| 2                               | 14 (5%)                             | 7 (6%)                                             | 3 (4%)                                  | 4 (5%)                           | 0 (0%)                                              |
| 3                               | 48<br>(16%)                         | 28 (24%)                                           | 5 (6%)                                  | 14 (18%)                         | 1 (4%)                                              |
| 4                               | 6 (2%)                              | 3 (3%)                                             | 0 (0%)                                  | 3 (4%)                           | 0 (0%)                                              |
| 5                               | 1 (0%)                              | 0 (0%)                                             | 0 (0%)                                  | 0 (0%)                           | 1 (4%)                                              |
| <b>Best response by day 100</b> |                                     |                                                    |                                         |                                  |                                                     |
| Complete response               | 147<br>(48%)                        | 67 (58%)                                           | 36 (43%)                                | 30 (38%)                         | 14 (50%)                                            |
| Partial response                | 59<br>(19%)                         | 23 (20%)                                           | 11 (13%)                                | 16 (21%)                         | 9 (32%)                                             |
| Stable /Progressive<br>disease  | 92<br>(30%)                         | 25 (22%)                                           | 33 (40%)                                | 29 (37%)                         | 5 (18%)                                             |
| Unevaluable                     | 7 (2%)                              | 1 (1%)                                             | 3 (4%)                                  | 3 (4%)                           | 0 (0%)                                              |

<sup>1</sup> n (%)

Abbreviations: Point-of-Care CD19-CAR-T cell (POC), Cytokine release syndrome (CRS), Immune effector cell-associated neurotoxicity syndrome (ICANS).

Table S4. Comparisons between refractory to CAR-T patients and those who responded to CAR-T and relapsed

| Characteristic                                       | Overall, N = 182 <sup>1</sup> | CAR-T refractory, n = 92 <sup>1</sup> | Post-CAR-T relapse, n = 90 <sup>1</sup> | p-value <sup>2</sup> |
|------------------------------------------------------|-------------------------------|---------------------------------------|-----------------------------------------|----------------------|
| <b>Age (years) at CAR-T infusion</b>                 | 62 (52 - 70)                  | 61 (52 - 69)                          | 64 (52 - 70)                            | 0.37                 |
| <b>LBCL type</b>                                     |                               |                                       |                                         | 0.053                |
| De novo                                              | 115 (64%)                     | 65 (71%)                              | 50 (57%)                                |                      |
| Transformed low-grade                                | 65 (36%)                      | 27 (29%)                              | 38 (43%)                                |                      |
| Unknown                                              | 2                             | 0                                     | 2                                       |                      |
| <b>Cell of origin</b>                                |                               |                                       |                                         | 0.33                 |
| Germinal Center B cells                              | 69 (44%)                      | 31 (40%)                              | 38 (48%)                                |                      |
| Non- Germinal Center B cells                         | 89 (56%)                      | 47 (60%)                              | 42 (52%)                                |                      |
| Unknown                                              | 24                            | 14                                    | 10                                      |                      |
| <b>Double/triple hit cytogenetics translocations</b> | 20 (15%)                      | 10 (15%)                              | 10 (15%)                                | >0.99                |
| Unknown                                              | 48                            | 25                                    | 23                                      |                      |
| <b>Number of prior lines of therapy</b>              |                               |                                       |                                         | 0.49                 |
| 2 lines                                              | 54 (30%)                      | 31 (34%)                              | 23 (26%)                                |                      |
| 3 lines                                              | 54 (30%)                      | 28 (30%)                              | 26 (29%)                                |                      |
| 4-5 lines                                            | 54 (30%)                      | 23 (25%)                              | 31 (34%)                                |                      |
| 6+ lines                                             | 20 (11%)                      | 10 (11%)                              | 10 (11%)                                |                      |
| <b>Prior autologous transplantation</b>              | 42 (23%)                      | 19 (21%)                              | 23 (26%)                                | 0.43                 |
| <b>Bulky disease at apheresis</b>                    | 29 (16%)                      | 18 (20%)                              | 11 (12%)                                | 0.18                 |
| <b>Primary refractory disease up to apheresis</b>    | 85 (47%)                      | 53 (58%)                              | 32 (36%)                                | 0.003                |
| <b>Patient received bridging</b>                     | 109 (60%)                     | 55 (60%)                              | 54 (60%)                                | 0.98                 |
| <b>Pre-CAR-T LDH</b>                                 |                               |                                       |                                         | 0.37                 |
| Normal range                                         | 67 (38%)                      | 31 (34%)                              | 36 (41%)                                |                      |
| > ULN                                                | 111 (62%)                     | 59 (66%)                              | 52 (59%)                                |                      |
| Unknown                                              | 4                             | 2                                     | 2                                       |                      |
| <b>Disease status at the time of CAR-T infusion</b>  |                               |                                       |                                         | 0.83                 |
| Complete response                                    | 3 (2%)                        | 1 (1%)                                | 2 (2%)                                  |                      |

| Characteristic                                                | Overall, N = 182 <sup>1</sup> | CAR-T refractory, n = 92 <sup>1</sup> | Post-CAR-T relapse, n = 90 <sup>1</sup> | p-value <sup>2</sup> |
|---------------------------------------------------------------|-------------------------------|---------------------------------------|-----------------------------------------|----------------------|
| Partial response                                              | 33 (18%)                      | 16 (18%)                              | 17 (19%)                                |                      |
| Stable /Progressive disease                                   | 143 (80%)                     | 73 (81%)                              | 70 (79%)                                |                      |
| Unknown                                                       | 3                             | 2                                     | 1                                       |                      |
| <b>Maximal ICANS grade</b>                                    |                               |                                       |                                         | 0.66                 |
| 0-1                                                           | 146 (80%)                     | 75 (82%)                              | 71 (79%)                                |                      |
| ≥ 2                                                           | 36 (20%)                      | 17 (18%)                              | 19 (21%)                                |                      |
| <b>Maximal CRS grade</b>                                      |                               |                                       |                                         | 0.93                 |
| 0-1                                                           | 132 (73%)                     | 67 (73%)                              | 65 (72%)                                |                      |
| ≥ 2                                                           | 50 (27%)                      | 25 (27%)                              | 25 (28%)                                |                      |
| <b>Median Pre- next line treatment LDH</b>                    | 298 (208 - 456)               | 325 (221 - 558)                       | 282 (187 - 419)                         | 0.21                 |
| Unknown                                                       | 66                            | 38                                    | 28                                      |                      |
| <b>Pre- next line treatment LDH</b>                           |                               |                                       |                                         | 0.57                 |
| Normal range                                                  | 44 (38%)                      | 19 (35%)                              | 25 (40%)                                |                      |
| > ULN                                                         | 72 (62%)                      | 35 (65%)                              | 37 (60%)                                |                      |
| Unknown                                                       | 66                            | 38                                    | 28                                      |                      |
| <b>Disease stage at relapse/progression</b>                   |                               |                                       |                                         | 0.066                |
| Stage I                                                       | 29 (18%)                      | 10 (13%)                              | 19 (23%)                                |                      |
| Stages II-IV                                                  | 135 (82%)                     | 73 (87%)                              | 62 (77%)                                |                      |
| Unknown                                                       | 18                            | 9                                     | 9                                       |                      |
| <b>Days from CAR-T to next treatment</b>                      | 83 (53 - 130)                 | 51 (37 - 66)                          | 123 (92 - 236)                          | <0.001               |
| No subsequent treatment                                       | 47                            | 32                                    | 15                                      |                      |
| <b>PET-avid sites at relapse/ progression</b>                 |                               |                                       |                                         | 0.017                |
| Previously involved                                           | 127 (78%)                     | 58 (70%)                              | 69 (86%)                                |                      |
| New involvement                                               | 35 (22%)                      | 24 (30%)                              | 11 (14%)                                |                      |
| Unknown                                                       | 20                            | 10                                    | 10                                      |                      |
| <b>CD19 antigen expression by flow at relapse/progression</b> |                               |                                       |                                         | 0.88                 |
| Normal                                                        | 35 (67%)                      | 10 (71%)                              | 25 (66%)                                |                      |
| Diminished (Dim)                                              | 14 (27%)                      | 3 (21%)                               | 11 (29%)                                |                      |
| Negative                                                      | 3 (6%)                        | 1 (7%)                                | 2 (5%)                                  |                      |

| Characteristic                              | Overall, N = 182 <sup>1</sup> | CAR-T refractory, n = 92 <sup>1</sup> | Post-CAR-T relapse, n = 90 <sup>1</sup> | p-value <sup>2</sup> |
|---------------------------------------------|-------------------------------|---------------------------------------|-----------------------------------------|----------------------|
| Unknown                                     | 130                           | 78                                    | 52                                      |                      |
| <b>CD19 Median fluorescence index (MFI)</b> | 10,249 (6,972 - 17,504)       | 11,924 (7,863 - 16,957)               | 9,638 (6,614 - 17,381)                  | 0.65                 |
| Unknown                                     | 130                           | 78                                    | 52                                      |                      |
| <b>CD19 MFI ratio</b>                       | 0.64 (0.42 - 1.10)            | 0.75 (0.48 - 1.01)                    | 0.60 (0.43 - 1.14)                      | 0.60                 |
| Unknown                                     | 130                           | 78                                    | 52                                      |                      |

<sup>1</sup>Median (IQR); n (%)

<sup>2</sup>Pearson's Chi-squared test; Fisher's exact test; Wilcoxon rank sum exact test; Wilcoxon rank sum test

<sup>3</sup>Double/ triple hit is defined by two or three recurrent chromosome translocations; *MYC*/8q24 loci in combination with the t (14; 18) (q32; q21) *bcl-2* gene or/and *BCL6*/3q27 chromosomal translocation.

Abbreviations: Large B cell lymphoma (LBCL), Lactate dehydrogenase (LDH), Upper Limit of Normal (ULN), Point-of-Care CD19-CAR-T cell (POC), Immune effector cell-associated neurotoxicity syndrome (ICANS), Cytokine release syndrome (CRS), Central Nervous System (CNS) Immunohistochemistry (IHC).



Table S5. Comparison of features by anti-cancer treatment status after CAR-T therapy

| Characteristic                                                  | Treatment post CAR-T<br>n = 135 <sup>1</sup> | No anti-cancer treatment<br>n=47 <sup>1</sup> | p-value <sup>2</sup> |
|-----------------------------------------------------------------|----------------------------------------------|-----------------------------------------------|----------------------|
| <b>Age at CAR-T infusion (y)</b>                                | 60 (49 - 69)                                 | 65 (57 - 72)                                  | 0.029                |
| <b>Patient sex</b>                                              |                                              |                                               | 0.53                 |
| Female                                                          | 50 (37%)                                     | 15 (32%)                                      |                      |
| Male                                                            | 85 (63%)                                     | 32 (68%)                                      |                      |
| <b>LBCL origin</b>                                              |                                              |                                               | 0.72                 |
| De novo                                                         | 86 (65%)                                     | 29 (62%)                                      |                      |
| Transformed from low-grade                                      | 47 (35%)                                     | 18 (38%)                                      |                      |
| Unknown                                                         | 2                                            | 0                                             |                      |
| <b>Cell of origin</b>                                           |                                              |                                               | 0.26                 |
| Germinal Center B cells                                         | 55 (46%)                                     | 14 (36%)                                      |                      |
| non- Germinal Center B cells                                    | 64 (54%)                                     | 25 (64%)                                      |                      |
| Unknown                                                         | 16                                           | 8                                             |                      |
| <b>Double/triple hit cytogenetic translocations<sup>3</sup></b> | 16 (16%)                                     | 4 (11%)                                       | 0.45                 |
| Unknown                                                         | 37                                           | 11                                            |                      |
| <b>Number of prior lines of therapy (pre-apheresis)</b>         |                                              |                                               | 0.34                 |
| 2 lines                                                         | 41 (30%)                                     | 13 (28%)                                      |                      |
| 3 lines                                                         | 36 (27%)                                     | 18 (38%)                                      |                      |
| 4-5 lines                                                       | 44 (33%)                                     | 10 (21%)                                      |                      |
| 6+ lines                                                        | 14 (10%)                                     | 6 (13%)                                       |                      |
| <b>Primary refractory disease (pre-apheresis)</b>               | 58 (43%)                                     | 27 (57%)                                      | 0.087                |
| <b>Prior autologous transplantation</b>                         | 36 (27%)                                     | 6 (13%)                                       | 0.051                |
| <b>Prior allogeneic transplantation</b>                         | 9 (7%)                                       | 0 (0%)                                        | 0.11                 |
| <b>Bulky disease at apheresis</b>                               | 16 (12%)                                     | 13 (28%)                                      | 0.011                |
| <b>Patient received bridging</b>                                | 76 (56%)                                     | 33 (70%)                                      | 0.094                |
| <b>Pre-CAR-T LDH</b>                                            |                                              |                                               | 0.079                |
| Normal range                                                    | 55 (41%)                                     | 12 (27%)                                      |                      |
| > ULN                                                           | 78 (59%)                                     | 33 (73%)                                      |                      |
| Unknown                                                         | 2                                            | 2                                             |                      |
| <b>Disease status at the time of CAR-T infusion</b>             |                                              |                                               | 0.086                |
| Complete response                                               | 1 (1%)                                       | 2 (5%)                                        |                      |
| Partial response                                                | 28 (21%)                                     | 5 (11%)                                       |                      |
| Stable /Progressive disease                                     | 106 (79%)                                    | 37 (84%)                                      |                      |
| Unknown                                                         | 0                                            | 3                                             |                      |
| <b>CAR-T product</b>                                            |                                              |                                               | 0.41                 |

| Characteristic                                  | Treatment post CAR-T<br>n = 135 <sup>1</sup> | No anti-cancer treatment<br>n=47 <sup>1</sup> | p-value <sup>2</sup> |
|-------------------------------------------------|----------------------------------------------|-----------------------------------------------|----------------------|
| Axicabtagene ciloleucel                         | 42 (31%)                                     | 18 (38%)                                      |                      |
| Lisocabtagene maraleucel                        | 17 (12%)                                     | 2 (4%)                                        |                      |
| POC CAR-T                                       | 32 (24%)                                     | 12 (26%)                                      |                      |
| Tisagenlecleucel                                | 44 (33%)                                     | 15 (32%)                                      |                      |
| <b>Maximal ICANS grade</b>                      |                                              |                                               |                      |
| 0-1                                             | 114 (84%)                                    | 32 (68%)                                      |                      |
| ≥ 2                                             | 21 (16%)                                     | 15 (32%)                                      |                      |
| <b>Maximal CRS grade</b>                        |                                              |                                               | 0.43                 |
| 0-1                                             | 100 (74%)                                    | 32 (68%)                                      |                      |
| ≥ 2                                             | 35 (26%)                                     | 15 (32%)                                      |                      |
| <b>Overall response to CAR-T</b>                |                                              |                                               | 0.005                |
| Responder                                       | 75 (56%)                                     | 15 (32%)                                      |                      |
| No responder                                    | 60 (44%)                                     | 32 (68%)                                      |                      |
| <b>Best response to CAR T (day 100)</b>         |                                              |                                               | 0.017                |
| Complete response                               | 43 (32%)                                     | 10 (21%)                                      |                      |
| Partial response                                | 32 (24%)                                     | 5 (11%)                                       |                      |
| Stable /Progressive disease                     | 60 (44%)                                     | 32 (68%)                                      |                      |
| <b>Disease stage at relapse or progression</b>  |                                              |                                               | 0.034                |
| Stage I                                         | 26 (21%)                                     | 3 (10%)                                       |                      |
| Stages II-IV                                    | 99 (79%)                                     | 36 (90%)                                      |                      |
| Unknown                                         | 10                                           | 8                                             |                      |
| <b>PET-avid sites at relapse or progression</b> |                                              |                                               | 0.12                 |
| Previously involved                             | 99 (81%)                                     | 28 (70%)                                      |                      |
| New involvement                                 | 24 (19%)                                     | 11 (28%)                                      |                      |
| Unknown                                         | 12                                           | 8                                             |                      |

<sup>1</sup>Median (IQR); n (%)

<sup>2</sup>Pearson's Chi-squared test; Fisher's exact test; Wilcoxon rank sum exact test; Wilcoxon rank sum test

<sup>3</sup>Double/ triple hit is defined by two or three recurrent chromosome translocations; *MYC*/8q24 loci in combination with the t (14; 18) (q32; q21) bcl-2 gene or/and BCL6/3q27 chromosomal translocation.

Abbreviations: Large B cell lymphoma (LBCL), Lactate dehydrogenase (LDH), Upper Limit of Normal (ULN), Point-of-Care CD19-CAR-T cell (POC), Immune effector cell-associated neurotoxicity syndrome (ICANS), Cytokine release syndrome (CRS), Central Nervous System (CNS) Immunohistochemistry (IHC).

Table S6. Post-CAR-T Treatment strategies

| <b>Treatment group</b>                                                             | <b>Specific treatment strategies</b>                                                                                                                                                                                                                                                                                                                                                                                                                                            |
|------------------------------------------------------------------------------------|---------------------------------------------------------------------------------------------------------------------------------------------------------------------------------------------------------------------------------------------------------------------------------------------------------------------------------------------------------------------------------------------------------------------------------------------------------------------------------|
| <b>Lenalidomide-based (n=15)</b>                                                   | Lenalidomide monotherapy (n=8)<br>Lenalidomide plus Tafasitamab(n=5)<br>Lenalidomide Ibrutinib (n=2)                                                                                                                                                                                                                                                                                                                                                                            |
| <b>Standard chemotherapy strategies - anthracycline and platinum-based (n =17)</b> | Etoposide, doxorubicin, vincristine, cyclophosphamide, prednisone (EPOCH +/- dose adjusted) (n= 2)<br>Gemcitabine, oxaloplatin GEMOX (n= 3)<br>Cyclophosphamide, doxorubicin, vincristine, prednisone (CHOP) (n= 1)<br>Ifosfamide, carboplatin, and etoposide ICE (n= 3)<br>Ifosphamide, etoposide, epirubicin IVE (n= 3)<br>Mesna, ifosfamide, mitoxantrone, etoposide MINE (n= 2)<br>BCNU, etoposide, ara-c (cytarabine), melphalan (mini-BEAM: not auto-conditioning) (n= 3) |
| <b>Polatuzumab-based strategies (n=29)</b>                                         | Polatuzumab monotherapy (n= 3)<br>Polatuzumab Bendamustine Pola BR (n= 23)<br>Polatuzumab Bendamustine and ISRT (n= 2)<br>Polatuzumab Bendamustine and Ibrutinib (n= 1)                                                                                                                                                                                                                                                                                                         |
| <b>BTKi-based (n=14)</b>                                                           | Ibrutinib monotherapy (n= 3)<br>Ibrutinib Venetoclax (n= 1)<br>Ibrutinib Bendamustine (n= 8)<br>Ibrutinib Selinexor (n= 1)<br>Loxo 305 (n= 1)                                                                                                                                                                                                                                                                                                                                   |
| <b>Immune checkpoint inhibitors (n=10)</b>                                         | Pembrolizumab (n= 7)<br>Nivolumab (n= 1)<br>Nivolumab + Ibrutinib (n= 1)<br>Tazametostat atezolizumab (n= 1)                                                                                                                                                                                                                                                                                                                                                                    |
| <b>ISRT(n=15)</b>                                                                  | ISRT monotherapy                                                                                                                                                                                                                                                                                                                                                                                                                                                                |
| <b>Investigational/other (n=35)</b>                                                | Investigational (n=23)<br>Selinexor (n=1)<br>High Dose MTX (n=3)<br>High dose Cytarabine(n=1)<br>Allogeneic transplantation (n=3)<br>2 <sup>nd</sup> CD19 CAR T Therapy: Lisocabtagene Maraleucel (n=3)<br>Single agent Rituximab (n=1)                                                                                                                                                                                                                                         |

Table S7. Patient characteristics by post-CAR-T treatment groups

| Characteristic                                    | Investigational/other<br>/allogeneic HCT<br>n = 35 <sup>1</sup> | Polatuzumab-<br>based<br>n=29 <sup>1</sup> | Chemo<br>Based<br>n=17 <sup>1</sup> | ISRT<br>Monotherapy<br>n=15 <sup>1</sup> | Lenalidomide<br>based<br>n=15 <sup>1</sup> | BTKi<br>based<br>n=14 <sup>1</sup> | Checkpoint<br>inhibitors<br>n=10 <sup>1</sup> |
|---------------------------------------------------|-----------------------------------------------------------------|--------------------------------------------|-------------------------------------|------------------------------------------|--------------------------------------------|------------------------------------|-----------------------------------------------|
| <b>Age at treatment (years)</b>                   | 65 (58 - 72)                                                    | 57 (45 - 68)                               | 60 (55 - 66)                        | 63 (58 - 70)                             | 69 (56 - 72)                               | 52 (35 - 67)                       | 46 (39 - 62)                                  |
| ≤ 65                                              | 17 (49%)                                                        | 19 (66%)                                   | 12 (71%)                            | 9 (60%)                                  | 5 (33%)                                    | 10 (71%)                           | 8 (80%)                                       |
| > 65                                              | 18 (51%)                                                        | 10 (34%)                                   | 5 (29%)                             | 6 (40%)                                  | 10 (67%)                                   | 4 (29%)                            | 2 (20%)                                       |
| <b>LBCL origin</b>                                |                                                                 |                                            |                                     |                                          |                                            |                                    |                                               |
| De novo                                           | 18 (53%)                                                        | 16 (55%)                                   | 14 (82%)                            | 10 (67%)                                 | 10 (67%)                                   | 9 (69%)                            | 9 (90%)                                       |
| Transformed from low-grade                        | 16 (47%)                                                        | 13 (45%)                                   | 3 (18%)                             | 5 (33%)                                  | 5 (33%)                                    | 4 (31%)                            | 1 (10%)                                       |
| Unknown                                           | 1                                                               | 0                                          | 0                                   | 0                                        | 0                                          | 1                                  | 0                                             |
| <b>Cell of origin</b>                             |                                                                 |                                            |                                     |                                          |                                            |                                    |                                               |
| Germinal center B cells                           | 14 (41%)                                                        | 15 (58%)                                   | 5 (33%)                             | 9 (69%)                                  | 6 (40%)                                    | 5 (38%)                            | 1 (33%)                                       |
| non-Germinal center B cells                       | 20 (59%)                                                        | 11 (42%)                                   | 10 (67%)                            | 4 (31%)                                  | 9 (60%)                                    | 8 (62%)                            | 2 (67%)                                       |
| Unknown                                           | 1                                                               | 3                                          | 2                                   | 2                                        | 0                                          | 1                                  | 7                                             |
| <b>Double/triple HIT</b>                          | 6 (21%)                                                         | 4 (19%)                                    | 2 (15%)                             | 2 (15%)                                  | 1 (8%)                                     | 1 (12%)                            | 0 (0%)                                        |
| Unknown                                           | 7                                                               | 8                                          | 4                                   | 2                                        | 3                                          | 6                                  | 7                                             |
| <b>Number of pre-apheresis lines of therapy</b>   |                                                                 |                                            |                                     |                                          |                                            |                                    |                                               |
| 2 lines                                           | 7 (20%)                                                         | 15 (52%)                                   | 3 (18%)                             | 4 (27%)                                  | 2 (13%)                                    | 6 (43%)                            | 4 (40%)                                       |
| 3 lines                                           | 11 (31%)                                                        | 4 (14%)                                    | 7 (41%)                             | 5 (33%)                                  | 3 (20%)                                    | 5 (36%)                            | 1 (10%)                                       |
| 4-5 lines                                         | 13 (37%)                                                        | 7 (24%)                                    | 4 (24%)                             | 4 (27%)                                  | 9 (60%)                                    | 3 (21%)                            | 4 (40%)                                       |
| 6+ lines                                          | 4 (11%)                                                         | 3 (10%)                                    | 3 (18%)                             | 2 (13%)                                  | 1 (7%)                                     | 0 (0%)                             | 1 (10%)                                       |
| <b>Primary refractory disease (pre-apheresis)</b> | 12 (34%)                                                        | 13 (45%)                                   | 10 (59%)                            | 5 (33%)                                  | 5 (33%)                                    | 7 (50%)                            | 6 (60%)                                       |

| <b>Characteristic</b>                               | <b>Investigational/other<br/>/allogeneic HCT<br/>n = 35<sup>1</sup></b> | <b>Polatuzumab-<br/>based<br/>n=29<sup>1</sup></b> | <b>Chemo<br/>Based<br/>n=17<sup>1</sup></b> | <b>ISRT<br/>Monotherapy<br/>n=15<sup>1</sup></b> | <b>Lenalidomide<br/>based<br/>n=15<sup>1</sup></b> | <b>BTKi<br/>based<br/>n=14<sup>1</sup></b> | <b>Checkpoint<br/>inhibitors<br/>n=10<sup>1</sup></b> |
|-----------------------------------------------------|-------------------------------------------------------------------------|----------------------------------------------------|---------------------------------------------|--------------------------------------------------|----------------------------------------------------|--------------------------------------------|-------------------------------------------------------|
| <b>Prior platinum therapy</b>                       | 30 (86%)                                                                | 26 (90%)                                           | 12<br>(71%)                                 | 13 (87%)                                         | 11 (73%)                                           | 10 (71%)                                   | 9 (90%)                                               |
| <b>Prior ISRT</b>                                   | 7 (20%)                                                                 | 7 (24%)                                            | 5 (29%)                                     | 3 (20%)                                          | 5 (33%)                                            | 5 (36%)                                    | 1 (10%)                                               |
| <b>Prior lenalidomide<br/>exposure</b>              | 3 (9%)                                                                  | 0 (0%)                                             | 5 (29%)                                     | 3 (20%)                                          | 2 (13%)                                            | 0 (0%)                                     | 0 (0%)                                                |
| <b>Prior checkpoint<br/>inhibitors</b>              | 6 (17%)                                                                 | 1 (3%)                                             | 2 (12%)                                     | 0 (0%)                                           | 0 (0%)                                             | 1 (7%)                                     | 2 (20%)                                               |
| <b>Prior BTKi</b>                                   | 0                                                                       | 0                                                  | 0                                           | 0                                                | 0                                                  | 0                                          | 0                                                     |
| <b>Prior Polatuzumab</b>                            | 4 (11%)                                                                 | 1 (3%)                                             | 0 (0%)                                      | 1 (7%)                                           | 3 (20%)                                            | 0 (0%)                                     | 1 (10%)                                               |
| <b>Prior autologous HCT</b>                         | 11 (31%)                                                                | 6 (21%)                                            | 4 (24%)                                     | 3 (20%)                                          | 3 (20%)                                            | 5 (33%)                                    | 4 (40%)                                               |
| <b>Prior allogeneic HCT</b>                         | 2 (6%)                                                                  | 1 (3%)                                             | 4 (24%)                                     | 1 (7%)                                           | 0 (0%)                                             | 0 (0%)                                     | 1 (10%)                                               |
| <b>Bulky disease at apheresis</b>                   | 4 (11%)                                                                 | 3 (10%)                                            | 4 (24%)                                     | 1 (7%)                                           | 0 (0%)                                             | 2 (14%)                                    | 2 (20%)                                               |
| <b>Bridging treatment</b>                           | 21 (60%)                                                                | 20 (69%)                                           | 8 (47%)                                     | 9 (60%)                                          | 8 (53%)                                            | 6 (43%)                                    | 4 (40%)                                               |
| <b>Pre-CAR-T LDH</b>                                |                                                                         |                                                    |                                             |                                                  |                                                    |                                            |                                                       |
| Normal range                                        | 15 (43%)                                                                | 10 (34%)                                           | 6 (35%)                                     | 7 (47%)                                          | 11 (73%)                                           | 2 (15%)                                    | 4 (44%)                                               |
| > ULN                                               | 20 (57%)                                                                | 19 (66%)                                           | 11<br>(65%)                                 | 8 (53%)                                          | 4 (27%)                                            | 11 (85%)                                   | 5 (56%)                                               |
| Unknown                                             | 0                                                                       | 0                                                  | 0                                           | 0                                                | 0                                                  | 1                                          | 1                                                     |
| <b>Disease status at the time of CAR-T infusion</b> |                                                                         |                                                    |                                             |                                                  |                                                    |                                            |                                                       |
| Complete response                                   | 0 (0%)                                                                  | 0 (0%)                                             | 1 (6%)                                      | 0 (0%)                                           | 0 (0%)                                             | 0 (0%)                                     | 0 (0%)                                                |
| Partial response                                    | 9 (26%)                                                                 | 5 (17%)                                            | 3 (18%)                                     | 3 (20%)                                          | 3 (20%)                                            | 3 (21%)                                    | 2 (20%)                                               |
| Stable /Progressive<br>disease                      | 26 (74%)                                                                | 24 (83%)                                           | 13<br>(76%)                                 | 12 (80%)                                         | 12 (80%)                                           | 11 (79%)                                   | 8 (80%)                                               |
| <b>CART product</b>                                 |                                                                         |                                                    |                                             |                                                  |                                                    |                                            |                                                       |
| Axicabtagene ciloleucel                             | 11 (31%)                                                                | 9 (31%)                                            | 2 (12%)                                     | 5 (33%)                                          | 8 (53%)                                            | 2 (14%)                                    | 5 (50%)                                               |
| Lisocabtagene<br>maraleucel                         | 5 (14%)                                                                 | 1 (3%)                                             | 2 (12%)                                     | 6 (40%)                                          | 1 (7%)                                             | 1 (7%)                                     | 1 (10%)                                               |
| POC CAR-T                                           | 6 (17%)                                                                 | 6 (21%)                                            | 9 (53%)                                     | 0 (0%)                                           | 1 (7%)                                             | 6 (43%)                                    | 4 (40%)                                               |
| Tisagenlecleucel                                    | 13 (37%)                                                                | 13 (45%)                                           | 4 (24%)                                     | 4 (27%)                                          | 5 (33%)                                            | 5 (36%)                                    | 0 (0%)                                                |

| <b>Characteristic</b>                         | <b>Investigational/other<br/>/allogeneic HCT<br/>n = 35<sup>1</sup></b> | <b>Polatuzumab-<br/>based<br/>n=29<sup>1</sup></b> | <b>Chemo<br/>Based<br/>n=17<sup>1</sup></b> | <b>ISRT<br/>Monotherapy<br/>n=15<sup>1</sup></b> | <b>Lenalidomide<br/>based<br/>n=15<sup>1</sup></b> | <b>BTKi<br/>based<br/>n=14<sup>1</sup></b> | <b>Checkpoint<br/>inhibitors<br/>n=10<sup>1</sup></b> |
|-----------------------------------------------|-------------------------------------------------------------------------|----------------------------------------------------|---------------------------------------------|--------------------------------------------------|----------------------------------------------------|--------------------------------------------|-------------------------------------------------------|
| <b>Maximal ICANS grade</b>                    |                                                                         |                                                    |                                             |                                                  |                                                    |                                            |                                                       |
| 0-1                                           | 28 (80%)                                                                | 25 (86%)                                           | 15<br>(88%)                                 | 13 (87%)                                         | 12 (80%)                                           | 13 (93%)                                   | 8 (80%)                                               |
| ≥ 2                                           | 7 (20%)                                                                 | 4 (14%)                                            | 2 (12%)                                     | 2 (13%)                                          | 3 (20%)                                            | 1 (7%)                                     | 2 (20%)                                               |
| <b>Maximal CRS grade</b>                      |                                                                         |                                                    |                                             |                                                  |                                                    |                                            |                                                       |
| 0-1                                           | 27 (77%)                                                                | 21 (72%)                                           | 15<br>(88%)                                 | 11 (73%)                                         | 7 (47%)                                            | 12 (86%)                                   | 7 (70%)                                               |
| ≥ 2                                           | 8 (23%)                                                                 | 8 (28%)                                            | 2 (12%)                                     | 4 (27%)                                          | 8 (53%)                                            | 2 (14%)                                    | 3 (30%)                                               |
| <b>Best response to CAR-T (day 100)</b>       |                                                                         |                                                    |                                             |                                                  |                                                    |                                            |                                                       |
| Complete response (CR)                        | 16 (46%)                                                                | 10 (34%)                                           | 4 (24%)                                     | 4 (27%)                                          | 6 (40%)                                            | 1 (7%)                                     | 2 (20%)                                               |
| Partial response (PR)                         | 10 (29%)                                                                | 5 (17%)                                            | 2 (12%)                                     | 5 (33%)                                          | 4 (27%)                                            | 4 (29%)                                    | 2 (20%)                                               |
| Stable /Progressive<br>disease SD/PD          | 9 (26%)                                                                 | 14 (48%)                                           | 11<br>(65%)                                 | 6 (40%)                                          | 5 (33%)                                            | 9 (64%)                                    | 6 (60%)                                               |
| <b>Disease stage at relapse/progression</b>   |                                                                         |                                                    |                                             |                                                  |                                                    |                                            |                                                       |
| Stage I                                       | 7 (22%)                                                                 | 3 (12%)                                            | 2 (12%)                                     | 9 (60%)                                          | 2 (13%)                                            | 1 (9%)                                     | 2 (20%)                                               |
| Stages II-IV                                  | 25 (78%)                                                                | 23 (88%)                                           | 15<br>(88%)                                 | 6 (40%)                                          | 13 (87%)                                           | 10 (91%)                                   | 8 (80%)                                               |
| Unknown                                       | 3                                                                       | 3                                                  | 0                                           | 0                                                | 0                                                  | 3                                          | 0                                                     |
| <b>PET-avid sites at relapse/ progression</b> |                                                                         |                                                    |                                             |                                                  |                                                    |                                            |                                                       |
| Previously involved                           | 30 (94%)                                                                | 17 (71%)                                           | 9 (53%)                                     | 14 (93%)                                         | 13 (87%)                                           | 8 (73%)                                    | 9 (90%)                                               |
| New involvement                               | 2 (6%)                                                                  | 7 (29%)                                            | 8 (47%)                                     | 1 (7%)                                           | 2 (13%)                                            | 3 (27%)                                    | 1 (10%)                                               |
| Unknown                                       | 3                                                                       | 5                                                  | 0                                           | 0                                                | 0                                                  | 3                                          | 0                                                     |
| <b>Pre-next-line treatment</b>                |                                                                         |                                                    |                                             |                                                  |                                                    |                                            |                                                       |
| <b>LDH</b>                                    | 306 (234 - 423)                                                         | 327 (252 - 651)                                    | 364 (252 - 702)                             | 250 (164 - 385)                                  | 208 (186 - 285)                                    | 320 (247 - 421)                            | 270 (205 - 453)                                       |
| Normal range                                  | 11 (33%)                                                                | 6 (29%)                                            | 4 (25%)                                     | 6 (60%)                                          | 9 (60%)                                            | 4 (31%)                                    | 4 (50%)                                               |
| > ULN                                         | 22 (67%)                                                                | 15 (71%)                                           | 12<br>(75%)                                 | 4 (40%)                                          | 6 (40%)                                            | 9 (69%)                                    | 4 (50%)                                               |
| Unknown                                       | 2                                                                       | 8                                                  | 1                                           | 5                                                | 0                                                  | 1                                          | 2                                                     |

| <b>Characteristic</b>                        | <b>Investigational/other<br/>/allogeneic HCT<br/>n = 35<sup>1</sup></b> | <b>Polatuzumab-<br/>based<br/>n=29<sup>1</sup></b> | <b>Chemo<br/>Based<br/>n=17<sup>1</sup></b> | <b>ISRT<br/>Monotherapy<br/>n=15<sup>1</sup></b> | <b>Lenalidomide<br/>based<br/>n=15<sup>1</sup></b> | <b>BTKi<br/>based<br/>n=14<sup>1</sup></b> | <b>Checkpoint<br/>inhibitors<br/>n=10<sup>1</sup></b> |
|----------------------------------------------|-------------------------------------------------------------------------|----------------------------------------------------|---------------------------------------------|--------------------------------------------------|----------------------------------------------------|--------------------------------------------|-------------------------------------------------------|
| <b>Days from CAR-T to next<br/>treatment</b> | 112 (84 - 200)                                                          | 80 (60 - 111)                                      | 45 (27 -<br>138)                            | 80 (56 - 278)                                    | 98 (56 - 194)                                      | 47 (34 - 69)                               | 65 (53 - 77)                                          |

<sup>1</sup>Median (IQR); n (%)

<sup>2</sup>Double/ triple hit is defined by two or three recurrent chromosome translocations; *MYC*/8q24 loci in combination with the t (14; 18) (q32; q21) *bcl-2* gene or/and *BCL6*/3q27 chromosomal translocation.

Abbreviations: Hematopoetic stem cell transplantation (HCT), Chemotherapy (chemo), Involved site radiation therapy (ISRT), Bruton tirosin Kinasa inhibitors (BTKi), Large B cell lymphoma (LBCL), Lactate dehydrogenase (LDH), Upper Limit of Normal (ULN), Point-of-Care CD19-CAR-T cell (POC), Immune effector cell-associated neurotoxicity syndrome (ICANS), Cytokine release syndrome (CRS), Central Nervous System (CNS) Immunohistochemistry (IH)

Table S8. Response rates to first-line treatment post CAR T therapy

| <b>Characteristic</b> | <b>Investigational/other<br/>/allogeneic HCT<br/>n = 35<sup>1</sup></b> | <b>Polatuzumab-<br/>based<br/>n=29<sup>1</sup></b> | <b>Chemo<br/>Based<br/>n=17<sup>1</sup></b> | <b>ISRT<br/>Monotherapy<br/>n=15<sup>1</sup></b> | <b>Lenalidomide<br/>based<br/>n=15<sup>1</sup></b> | <b>BTKi<br/>based<br/>n=14<sup>1</sup></b> | <b>Checkpoint<br/>inhibitors<br/>n=10<sup>1</sup></b> |
|-----------------------|-------------------------------------------------------------------------|----------------------------------------------------|---------------------------------------------|--------------------------------------------------|----------------------------------------------------|--------------------------------------------|-------------------------------------------------------|
| CR                    | 5 (14%)                                                                 | 10 (34%)                                           | 0 (0%)                                      | 4 (27%)                                          | 5 (33%)                                            | 1 (7%)                                     | 2 (20%)                                               |
| PR                    | 5 (14%)                                                                 | 4 (14%)                                            | 7 (41%)                                     | 4 (27%)                                          | 0 (0%)                                             | 5<br>(36%)                                 | 0 (0%)                                                |
| SD/PD/NE              | 25 (71%)                                                                | 15 (52%)                                           | 10<br>(59%)                                 | 7 (47%)                                          | 10 (67%)                                           | 8<br>(57%)                                 | 8 (80%)                                               |

<sup>1</sup>n (%)

Abbreviations: Hematopoetic stem cell transplantation (HCT), Chemotherapy (chemo), Involved site radiation therapy (ISRT), Bruton tirosin Kinasa inhibitors (BTKi), Complete response (CR), Partial response (PR), Stable disease (SD), Progressive disease (PD), Response not evaluated (NE)



Table S9. 1-year probability of overall survival by treatment strategies

| <b>Treatment strategies</b>   | <b>12 months</b>     |
|-------------------------------|----------------------|
| Checkpoint inhibitors         | ----- (-----, -----) |
| BTKi-based                    | 21% (7.9%, 58%)      |
| Chemotherapy based approaches | 25% (11%, 59%)       |
| Polatuzumab-based             | 37% (22%, 63%)       |
| Lenalidomide-based            | 69% (48%, 100%)      |

Table S10. Multivariable Cox regression model comparing overall survival between the most frequent treatment groups after CAR-T

| Characteristic                             | n  | HR <sup>1</sup> | 95% CI <sup>1</sup> | p-value |
|--------------------------------------------|----|-----------------|---------------------|---------|
| <b>Age at post-CAR-T treatment (years)</b> | 65 |                 |                     |         |
| ≤ 65                                       |    | —               | —                   |         |
| >65                                        |    | 2.40            | 1.15, 5.00          | 0.019   |
| <b>Overall response to CAR-T</b>           | 65 |                 |                     |         |
| Responder                                  |    | —               | —                   |         |
| No responder                               |    | 1.36            | 0.56, 3.32          | 0.50    |
| <b>Pre-next line treatment LDH</b>         | 65 |                 |                     |         |
| Normal range                               |    | —               | —                   |         |
| > ULN                                      |    | 3.68            | 1.64, 8.28          | 0.002   |
| <b>Treatment strategies</b>                | 65 |                 |                     |         |
| Chemotherapy based                         |    | —               | —                   |         |
| BTKi-based                                 |    | 0.63            | 0.26, 1.52          | 0.30    |
| Lenalidomide-based                         |    | 0.25            | 0.07, 0.85          | 0.027   |
| Polatuzumab-based                          |    | 0.60            | 0.26, 1.34          | 0.21    |

<sup>1</sup>HR = Hazard Ratio, CI = Confidence Interval

Abbreviations: Lactate dehydrogenase (LDH), Upper Limit of Normal (ULN), Bruton Tyrosine Kinase Inhibitor (BTKi)

## Supplementary Figures

**Figure 1. Individual patient trajectories following treatment after CD19-CAR-T.** Swimmer plot depicting the clinical outcomes of the four most common treatment groups for non-localized disease. Bars are color-coded by best response to the first treatment after CAR-T.

CR – complete response; PR – partial response; SD/PD – stable disease/progressive disease.

1. Hans CP, Weisenburger DD, Greiner TC, et al: Confirmation of the molecular classification of diffuse large B-cell lymphoma by immunohistochemistry using a tissue microarray. *Blood* 103:275-282, 2004

# Supplemental Figure 1

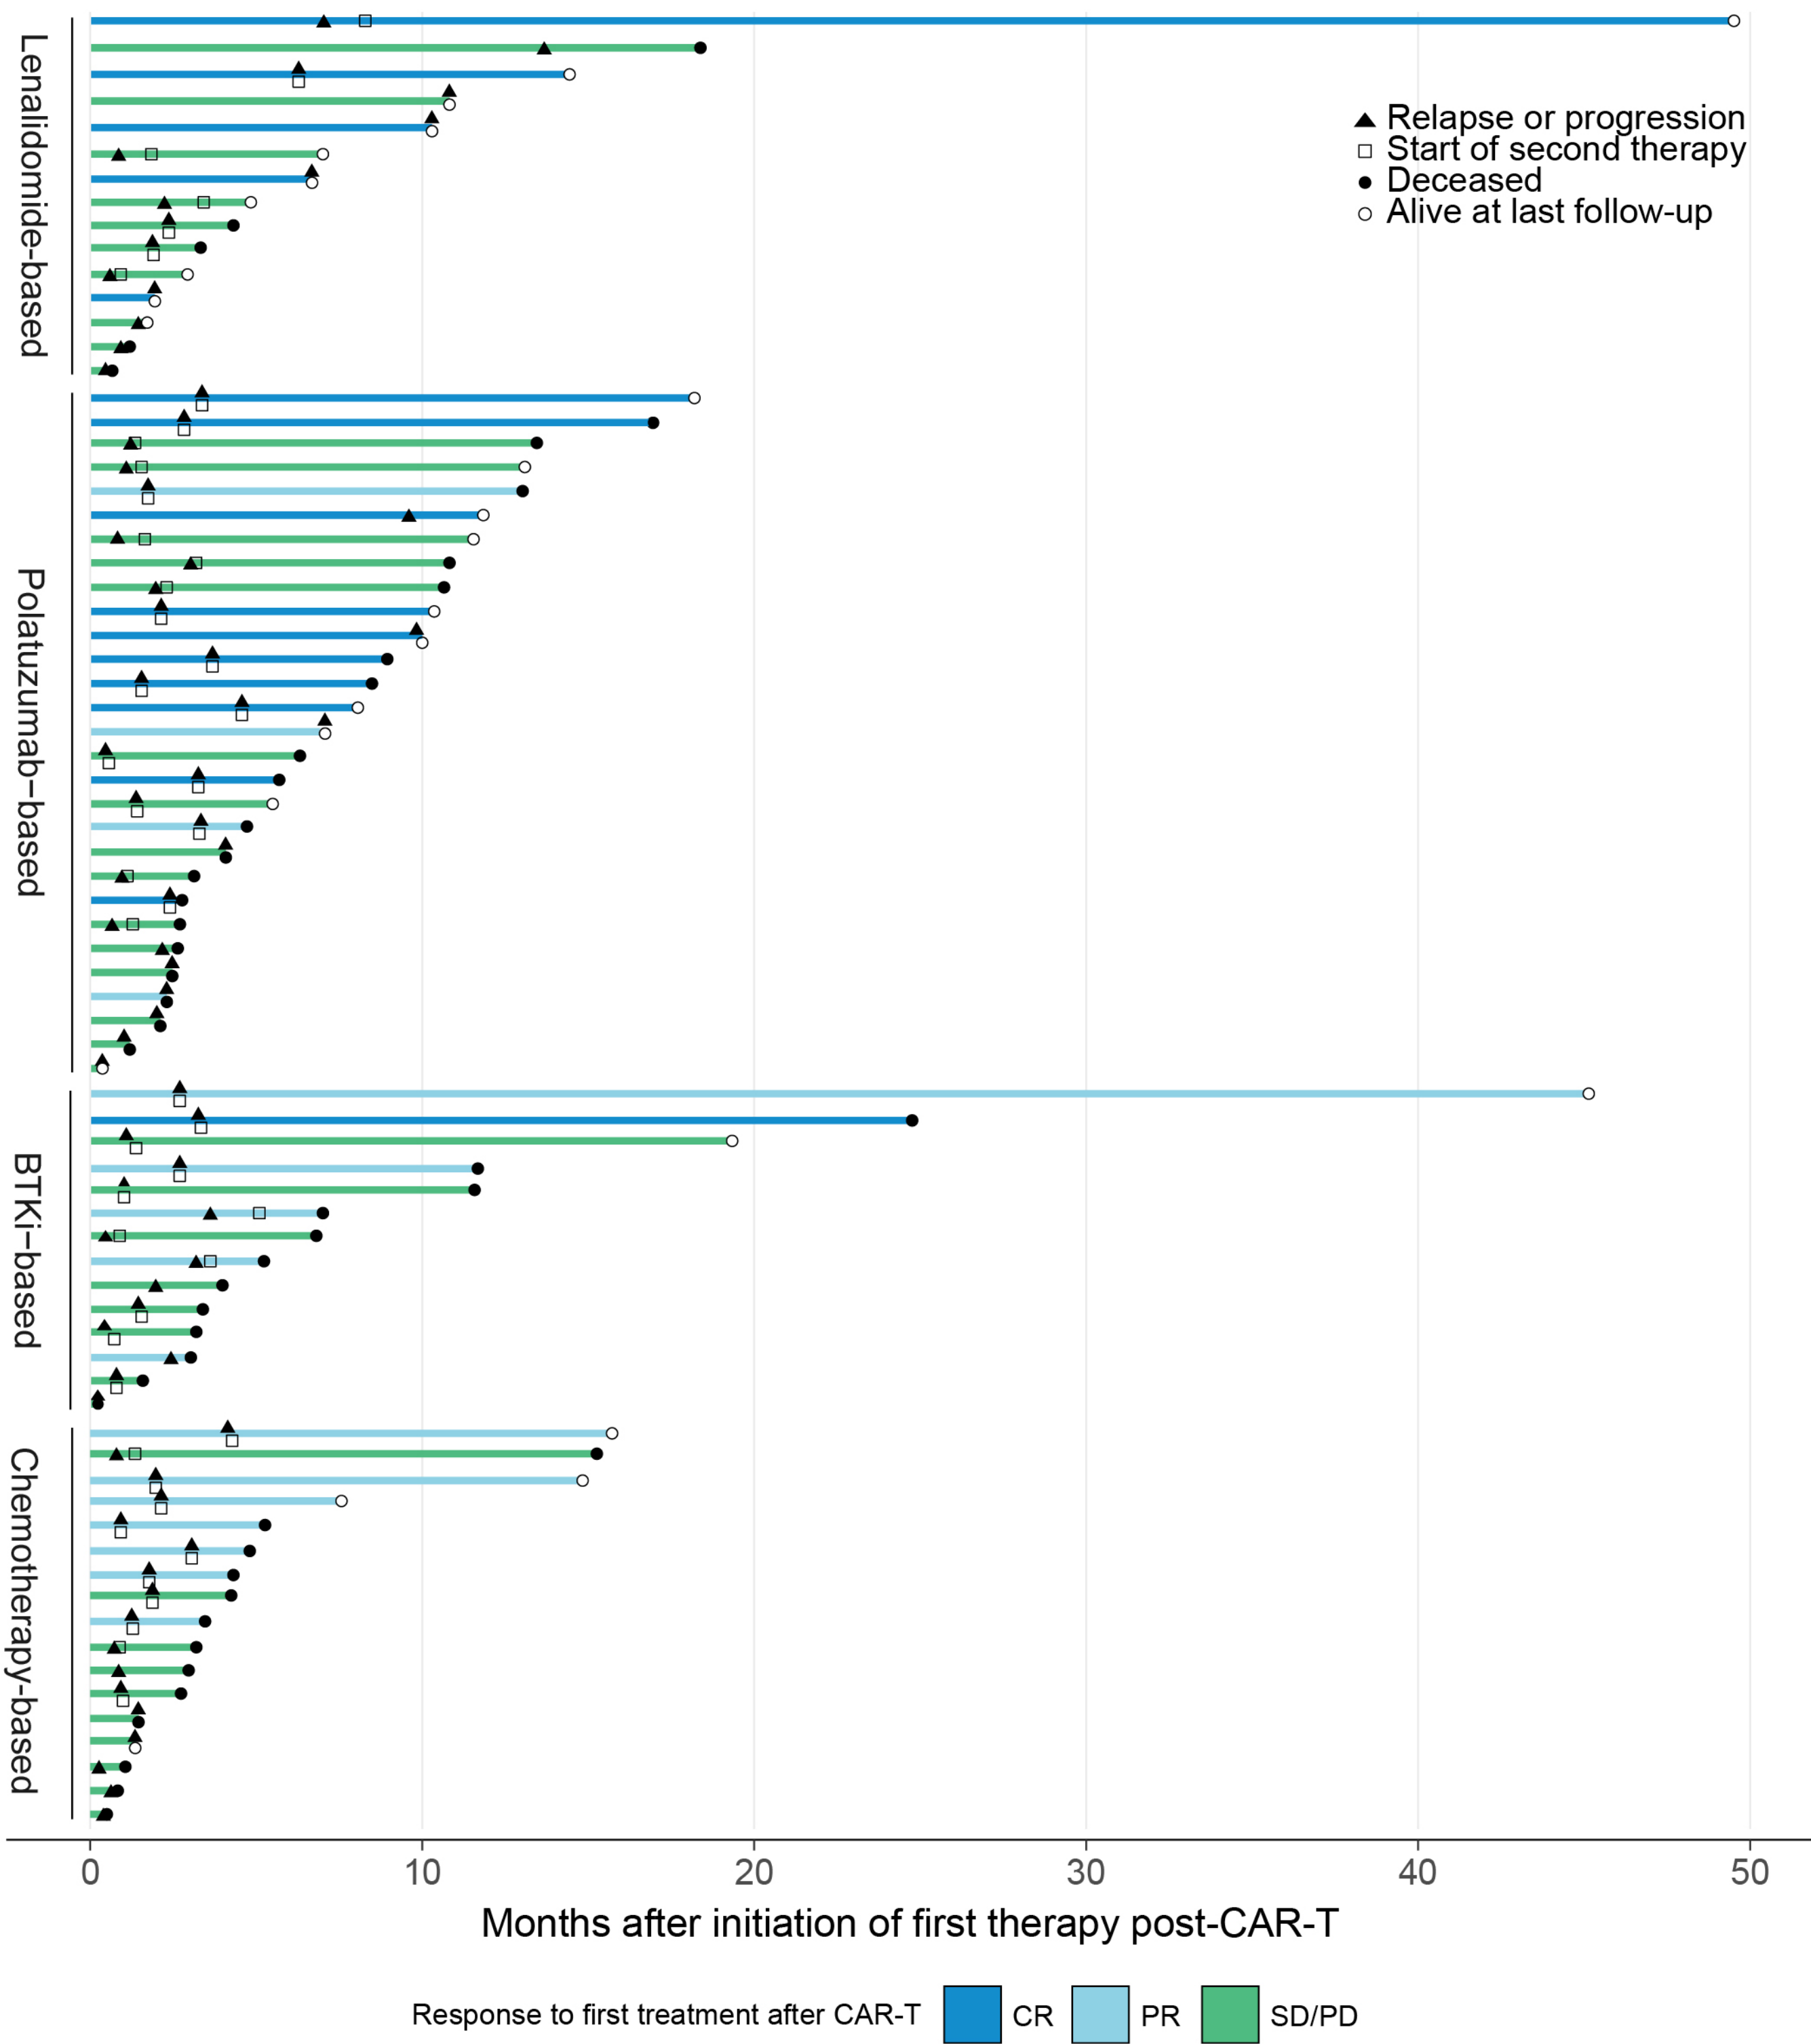

Supplement: NIHMS1845803-supplement-1845803_Sup_Material.pdf [file NIHMS1845803-supplement-1845803_Sup_Material.pdf]
